# Supplementary material
Source: publisher figshare collection journal article supplement (https://sage.figshare.com/ndownloader/files/15254174)
Supplement: Supplementary file 1 [file 15254174]

**Supplementary Table 4.** Factors affecting OS by Cox's proportional hazards regression analysis

| Items                                                                    | Cox's regression model |       |       |        |
|--------------------------------------------------------------------------|------------------------|-------|-------|--------|
|                                                                          | <i>P</i> value         | HR    | 95%CI |        |
|                                                                          |                        |       | Lower | Higher |
| Univariate Cox's regression                                              |                        |       |       |        |
| Circ-ABCB10 (high vs low)                                                | 0.010                  | 5.204 | 1.495 | 18.114 |
| Age (>60 years vs ≤60 years)                                             | 0.061                  | 2.708 | 0.954 | 7.690  |
| Gender (male vs female)                                                  | 0.955                  | 1.028 | 0.391 | 2.702  |
| Tumor location (left vs right)                                           | 0.928                  | 0.957 | 0.369 | 2.481  |
| Pathological grade (2/3 vs 1)                                            | 0.013                  | 4.888 | 1.404 | 17.017 |
| Tumor size (>5 cm vs ≤5 cm)                                              | 0.812                  | 0.891 | 0.344 | 2.309  |
| TNM stage (II/III vs I)                                                  | 0.023                  | 3.062 | 1.165 | 8.050  |
| Multivariate Cox's regression with Forward Stepwise (Conditional) method |                        |       |       |        |
| Circ-ABCB10 (high vs low)                                                | 0.009                  | 5.288 | 1.518 | 18.415 |
| Pathological grade (2/3 vs 1)                                            | 0.012                  | 4.971 | 1.427 | 17.315 |

Factors affecting OS were determined by univariate and multivariate Cox's proportional hazards regression analyses. *P* value < 0.05 was considered significant (in bold). OS: overall survival; HR: hazard ratio; CI: confidence interval.
